# Supplementary material
Source: ML conference proceedings conference paper supplement (https://openreview.net/forum?id=N7-EIciq3R)
Supplement: supplementary_material [file attachment]

## 451 A Proof of Theorem 1

452 In order to prove this theorem, we first need the following lemma showing the existence of partially  
453 symmetric CP decompositions.

454 **Lemma 1.** *Any partially symmetric tensor admits a partially symmetric CP decomposition.*

455 *Proof.* We show the results for 3-rd order tensors that are partially symmetric w.r.t. their two first  
456 modes. The proof can be straightforwardly extended to tensors of arbitrary order that are partially  
457 symmetric w.r.t. any subset of modes.

Let  $\mathcal{T} \in \mathbb{R}^{m \times m \times n}$  be partially symmetric w.r.t. modes 1 and 2. We have that  $\mathcal{T}_{::,i}$  is a symmetric tensor for each  $i \in [n]$ . By Lemma 4.2 in [11], each tensor  $\mathcal{T}_{::,i}$  admits a symmetric CP decomposition:

$$\mathcal{T}_{::,i} = [\mathbf{A}^{(i)}, \mathbf{A}^{(i)}], \quad i \in [n]$$

458 where  $\mathbf{A}^{(i)} \in \mathbb{R}^{m \times R_i}$  and  $R_i$  is the symmetric CP rank of  $\mathcal{T}_{::,i}$ .

By defining  $R = \sum_{i=1}^n R_i$  and  $\mathbf{A} = [\mathbf{A}^{(1)} \mathbf{A}^{(2)} \dots \mathbf{A}^{(n)}] \in \mathbb{R}^{m \times R}$ , one can easily check that  $\mathcal{T}$  admits the partially symmetric CP decomposition  $\mathcal{T} = [\mathbf{A}, \mathbf{A}, \mathbf{\Delta}]$  where  $\mathbf{\Delta} \in \mathbb{R}^{m \times R}$  is defined by

$$\Delta_{i,r} = \begin{cases} 1 & \text{if } R_1 + \dots + R_{i-1} < r \leq R_1 + \dots + R_i \\ 0 & \text{otherwise.} \end{cases}$$

459

□

460 We can now prove Theorem 1.

461 **Theorem.** *The function computed by a CP layer (Eq. (1)) is permutation-invariant. In addition, any*  
462 *permutation-invariant multilinear polynomial  $f : (\mathbb{R}^F)^k \rightarrow \mathbb{R}^d$  can be computed by a CP layer (with*  
463 *linear activation function).*

464 *Proof.* The fact that the function computed by a CP layer is permutation-invariant directly follows  
465 from the definition of the CP layer and the fact that the Hadamard product is commutative.

We now show the second part of the theorem. Let  $f : (\mathbb{R}^F)^k \rightarrow \mathbb{R}^d$  be a permutation-invariant multilinear polynomial map. Then, there exists permutation-invariant univariate multilinear polynomials  $g_{i,j_1,\dots,j_k}$  for  $j_1, \dots, j_k \in [F]$  and  $i \in [d]$  such that

$$f(\mathbf{x}_1, \dots, \mathbf{x}_k)_i = \sum_{j_1=1}^d \dots \sum_{j_k=1}^d g_{i,j_1,\dots,j_k}((\mathbf{x}_1)_{j_1}, \dots, (\mathbf{x}_k)_{j_k}).$$

Moreover, by definition, each such polynomial satisfies

$$g_{i,j_1,\dots,j_k}(a_1, a_2, \dots, a_k) = \sum_{i_1=0}^1 \dots \sum_{i_k=0}^1 \tau_{i_1,\dots,i_k}^{(i,j_1,\dots,j_k)} a_1^{i_1} a_2^{i_2} \dots a_k^{i_k}$$

for some scalars  $\tau_{i_1,\dots,i_k}^{(i,j_1,\dots,j_k)}$ . Putting those two expressions together, we get

$$f(\mathbf{x}_1, \dots, \mathbf{x}_k)_i = \sum_{j_1=1}^d \dots \sum_{j_k=1}^d \sum_{i_1=0}^1 \dots \sum_{i_k=0}^1 \tau_{i_1,\dots,i_k}^{(i,j_1,\dots,j_k)} (\mathbf{x}_1)_{j_1}^{i_1} \dots (\mathbf{x}_k)_{j_k}^{i_k}.$$

We can then group together the coefficients  $\tau_{i_1,\dots,i_k}^{(i,j_1,\dots,j_k)}$  corresponding to the same monomials  $(\mathbf{x}_1)_{j_1}^{i_1} \dots (\mathbf{x}_k)_{j_k}^{i_k}$ . E.g., the coefficients  $\tau_{1,0,\dots,0}^{(i,j_1,\dots,j_k)}$  all correspond to the same monomial  $(\mathbf{x}_1)_{j_1}$  for any values of  $j_2, j_3, \dots, j_k$ . Similarly, all the coefficients  $\tau_{0,1,\dots,1}^{(i,j_1,\dots,j_k)}$  all correspond to the same monomial  $(\mathbf{x}_2)_{j_2} \dots (\mathbf{x}_k)_{j_k}$  for any values of  $j_1$ . By grouping and summing together these coefficients into a tensor  $\mathcal{T} \in \mathbb{R}^{(F+1) \times \dots \times (F+1) \times d}$ , where  $\mathcal{T}_{j_1,\dots,j_k,i}$  is equal to the sum

$\sum_{j_\ell \in [F]: j_\ell = F+1 \wedge i_\ell = 0} \tau_{i_1,\dots,i_k}^{(i,j_1,\dots,j_k)}$ , we obtain

$$f(\mathbf{x}_1, \dots, \mathbf{x}_k)_i = \sum_{j_1=1}^{F+1} \sum_{j_2=1}^{F+1} \dots \sum_{j_k=1}^{F+1} \mathcal{T}_{j_1,j_2,\dots,j_k,i} \begin{pmatrix} \mathbf{x}_1 \\ 1 \end{pmatrix}_{j_1} \begin{pmatrix} \mathbf{x}_2 \\ 1 \end{pmatrix}_{j_2} \dots \begin{pmatrix} \mathbf{x}_k \\ 1 \end{pmatrix}_{j_k}.$$

Since  $f$  is permutation-invariant, the tensor  $\mathcal{T}$  is partially symmetric w.r.t. its first  $k$  modes. Thus, by Lemma 1, there exist matrices  $\mathbf{A} \in \mathbb{R}^{R \times F}$  and  $\mathbf{B} \in \mathbb{R}^{d \times R}$  such that

$$\begin{aligned} f(\mathbf{x}_1, \dots, \mathbf{x}_k) &= \mathcal{T} \times_1 \begin{bmatrix} \mathbf{x}_1 \\ 1 \end{bmatrix} \times_2 \cdots \times_k \begin{bmatrix} \mathbf{x}_k \\ 1 \end{bmatrix} \\ &= [\mathbf{A}, \dots, \mathbf{A}, \mathbf{B}] \times_1 \begin{bmatrix} \mathbf{x}_1 \\ 1 \end{bmatrix} \times_2 \cdots \times_k \begin{bmatrix} \mathbf{x}_k \\ 1 \end{bmatrix} \\ &= \mathbf{B} \sigma \left( \mathbf{A}^\top \begin{bmatrix} \mathbf{x}_1 \\ 1 \end{bmatrix} \odot \cdots \odot \mathbf{A}^\top \begin{bmatrix} \mathbf{x}_k \\ 1 \end{bmatrix} \right) \end{aligned}$$

with  $\sigma$  being the identity function, which concludes the proof.  $\square$

## B Proof of Theorem 2

**Theorem.** A CP layer of rank  $F \cdot k$  can compute the sum and mean aggregation functions for  $k$  vectors in  $\mathbb{R}^F$ .

Consequently, for any  $k \geq 1$  and any GNN  $\mathcal{N}$  using mean or sum pooling with feature and embedding dimensions bounded by  $F$ , there exists a GNN with CP layers of rank  $F \cdot k$  computing the same function as  $\mathcal{N}$  over all graphs of uniform degree  $k$ .

*Proof.* We will show that the function  $f : (\mathbb{R}^F)^k \rightarrow \mathbb{R}^d$  defined by

$$f(\mathbf{x}_1, \dots, \mathbf{x}_k) = \sum_{i=1}^k \alpha \mathbf{x}_i$$

where  $\alpha \in \mathbb{R}$ , can be computed by a CP layer of rank  $Fk$ , which will show the first part of the theorem. The second part of the theorem directly follows by letting  $\alpha = 1$  for the sum aggregation and  $\alpha = 1/k$  for the mean aggregation.

Let  $\tilde{\mathbf{e}}_1, \dots, \tilde{\mathbf{e}}_{F+1}$  be the canonical basis of  $\mathbb{R}^{F+1}$ , and let  $\mathbf{e}_1, \dots, \mathbf{e}_F$  be the canonical basis of  $\mathbb{R}^F$ . We define the tensor  $\mathcal{T} \in \mathbb{R}^{(F+1) \times \cdots \times (F+1) \times d}$  by

$$\mathcal{T} = \sum_{j=1}^d \sum_{\ell=1}^k \alpha \underbrace{\tilde{\mathbf{e}}_{F+1} \circ \cdots \circ \tilde{\mathbf{e}}_{F+1}}_{\ell-1 \text{ times}} \circ \tilde{\mathbf{e}}_j \circ \underbrace{\tilde{\mathbf{e}}_{F+1} \circ \cdots \circ \tilde{\mathbf{e}}_{F+1}}_{k-\ell \text{ times}} \circ \mathbf{e}_j$$

where  $\circ$  denotes the outer (or tensor) product between vectors. We start by showing that contracting  $k$  vectors in homogeneous coordinates along the first  $k$  modes of  $\mathcal{T}$  results in the sum of those vectors weighted by  $\alpha$ . For any vectors  $\mathbf{x}_1, \dots, \mathbf{x}_k \in \mathbb{R}^F$ , we have

$$\begin{aligned} \mathcal{T} \times_1 \begin{bmatrix} \mathbf{x}_1 \\ 1 \end{bmatrix} \times_2 \cdots \times_k \begin{bmatrix} \mathbf{x}_k \\ 1 \end{bmatrix} &= \left( \sum_{j=1}^d \sum_{\ell=1}^k \alpha \underbrace{\tilde{\mathbf{e}}_{F+1} \circ \cdots \circ \tilde{\mathbf{e}}_{F+1}}_{\ell-1 \text{ times}} \circ \tilde{\mathbf{e}}_j \circ \underbrace{\tilde{\mathbf{e}}_{F+1} \circ \cdots \circ \tilde{\mathbf{e}}_{F+1}}_{k-\ell \text{ times}} \circ \mathbf{e}_j \right) \times_1 \begin{bmatrix} \mathbf{x}_1 \\ 1 \end{bmatrix} \times_2 \cdots \times_k \begin{bmatrix} \mathbf{x}_k \\ 1 \end{bmatrix} \\ &= \sum_{j=1}^d \sum_{\ell=1}^k \alpha \left\langle \tilde{\mathbf{e}}_{F+1}, \begin{bmatrix} \mathbf{x}_1 \\ 1 \end{bmatrix} \right\rangle \cdots \left\langle \tilde{\mathbf{e}}_{F+1}, \begin{bmatrix} \mathbf{x}_{\ell-1} \\ 1 \end{bmatrix} \right\rangle \left\langle \tilde{\mathbf{e}}_j, \begin{bmatrix} \mathbf{x}_\ell \\ 1 \end{bmatrix} \right\rangle \left\langle \tilde{\mathbf{e}}_{F+1}, \begin{bmatrix} \mathbf{x}_{\ell+1} \\ 1 \end{bmatrix} \right\rangle \cdots \left\langle \tilde{\mathbf{e}}_{F+1}, \begin{bmatrix} \mathbf{x}_k \\ 1 \end{bmatrix} \right\rangle \mathbf{e}_j \\ &= \sum_{j=1}^d \sum_{\ell=1}^k (\alpha \cdot 1 \cdots 1 \cdot \langle \mathbf{x}_\ell, \mathbf{e}_j \rangle \cdot 1 \cdots 1) \mathbf{e}_j \\ &= \sum_{j=1}^d \left\langle \sum_{\ell=1}^k \alpha \mathbf{x}_\ell, \mathbf{e}_j \right\rangle \mathbf{e}_j \\ &= \sum_{\ell=1}^k \alpha \mathbf{x}_\ell = f(\mathbf{x}_1, \dots, \mathbf{x}_k). \end{aligned}$$

To show that  $f$  can be computed by a CP layer of rank  $Fk$ , it thus remains to show that  $\mathcal{T}$  admits a partially symmetric CP decomposition of rank  $Fk$ . This follows from Corollary 4.3 in [45], which

states that any  $k$ th order tensor  $\mathcal{A}$  of CP rank less than  $k$  has symmetric CP rank bounded by  $k$ . Indeed, consider the tensors

$$\mathcal{A}^{(j)} = \sum_{\ell=1}^k \alpha \underbrace{\tilde{\mathbf{e}}_{F+1} \circ \cdots \circ \tilde{\mathbf{e}}_{F+1}}_{\ell-1 \text{ times}} \circ \tilde{\mathbf{e}}_j \circ \underbrace{\tilde{\mathbf{e}}_{F+1} \circ \cdots \circ \tilde{\mathbf{e}}_{F+1}}_{k-\ell \text{ times}}$$

for  $j \in [d]$ . They are all  $k$ -th order tensor of CP rank bounded by  $k$ . Thus, by Corollary 4.3 in [45], they all admit a symmetric CP decomposition of rank at most  $k$ , from which it directly follows that the tensor  $\mathcal{T} = \sum_{j=1}^F \mathcal{A}^{(j)} \circ \mathbf{e}_j$  admits a partially symmetric CP decomposition of rank at most  $Fk$ .  $\square$

### C Proof of Theorem 3

**Theorem.** *With probability one, any function  $f_{CP} : (\mathbb{R}^F)^k \rightarrow \mathbb{R}^d$  computed by a CP layer (of any rank) whose parameters are drawn randomly (from a continuous distribution) cannot be computed by a function of the form*

$$g_{sum} : \mathbf{x}_1, \dots, \mathbf{x}_k \mapsto \sigma' \left( \mathbf{M} \left( \sigma \left( \sum_{i=1}^k \mathbf{W}^\top \mathbf{x}_i \right) \right) \right)$$

where  $\mathbf{M} \in \mathbb{R}^{d \times R}$ ,  $\mathbf{W} \in \mathbb{R}^{F \times R}$  and  $\sigma, \sigma'$  are component-wise activation function.

*Proof.* Let  $f_{CP} : (\mathbb{R}^F)^k \rightarrow \mathbb{R}^d$  be the function computed by a random CP layer. I.e.,

$$f_{CP}(\mathbf{x}_1, \dots, \mathbf{x}_k) = \mathbf{A} \left( \left( \mathbf{B}^\top \begin{bmatrix} \mathbf{x}_1 \\ 1 \end{bmatrix} \right) \odot \cdots \odot \left( \mathbf{B}^\top \begin{bmatrix} \mathbf{x}_k \\ 1 \end{bmatrix} \right) \right)$$

where the entries of the matrices  $\mathbf{B} \in \mathbb{R}^{(N+1) \times R}$  and  $\mathbf{A} \in \mathbb{R}^{M \times R}$  are identically and independently drawn from a distribution which is continuous w.r.t. the Lebesgue measure. It is well known that since the entries of the two parameter matrices are drawn from a continuous distribution, all the entries of  $\mathbf{A}$  and  $\mathbf{B}$  are non-zero and distinct with probability one. It follows that all the entries of the vector  $f_{CP}(\mathbf{x}_1, \dots, \mathbf{x}_k)$  are  $k$ -th order multilinear polynomials of the entries of the input vectors  $\mathbf{x}_1, \dots, \mathbf{x}_k$ , which, with probability one, have non trivial high-order interactions that cannot be computed by a linear map. In particular, with probability one, the map  $f_{CP}$  cannot be computed by any map of the form  $g_{sum} : \mathbf{x}_1, \dots, \mathbf{x}_k \mapsto \sigma' \left( \mathbf{M} \left( \sigma \left( \sum_{i=1}^k \mathbf{W}^\top \mathbf{x}_i \right) \right) \right)$  since the sum pooling aggregates the inputs in a way that prevents modeling independent higher order multiplicative interactions, despite the non-linear activation functions.  $\square$

## D Efficiency Study

We study efficiency by comparing tGNN with models on Cora on a CPU over 10 runtimes, and compare the number of model paramters, number of training epochs per second, and accuracy. Sampling means we sample '3' neighbors for each node or we use 'Full' neighborhood.

Table 4: Study of Efficiency vs. Performance on Cora. tGNN in comparison with GNN architectures.

|      | Dropout | LR    | Weight Decay | Hidden    | Rank | Head | Sampling | #Params | Time(s)   | Epoch | Epoch/s | Acc   | Std  |
|------|---------|-------|--------------|-----------|------|------|----------|---------|-----------|-------|---------|-------|------|
| tGNN | 0       | 0.005 | 5.00E-05     | 32        | 8    | —    | 3        | 58128   | 290.9774  | 1389  | 4.7736  | 85.55 | 1.33 |
| tGNN | 0       | 0.005 | 5.00E-05     | 32        | 32   | —    | 3        | 94272   | 790.0373  | 1321  | 1.6721  | 86.25 | 0.58 |
| tGNN | 0       | 0.005 | 5.00E-05     | 32        | 64   | —    | 3        | 142464  | 383.2255  | 1343  | 3.5045  | 86.06 | 1.08 |
| tGNN | 0       | 0.005 | 5.00E-05     | 32        | 128  | —    | 3        | 238848  | 999.1514  | 1247  | 1.2481  | 86.76 | 1.19 |
| tGNN | 0       | 0.005 | 5.00E-05     | 32        | 256  | —    | 3        | 431616  | 1193.7131 | 1272  | 1.0656  | 86.97 | 1.24 |
| tGNN | 0       | 0.005 | 5.00E-05     | 32        | 512  | —    | 3        | 817152  | 1621.9083 | 1332  | 0.8213  | 87.33 | 1.83 |
| tGNN | 0       | 0.005 | 5.00E-05     | 32        | 1024 | —    | 3        | 1588224 | 2377.5139 | 1265  | 0.5321  | 87.62 | 1.63 |
| GCN  | 0       | 0.005 | 5.00E-05     | 32        | —    | —    | 3        | 46080   | 212.3576  | 1509  | 7.1059  | 84.29 | 1.02 |
| GCN  | 0       | 0.005 | 5.00E-05     | 32        | —    | —    | Full     | 46080   | 205.0601  | 1276  | 6.2226  | 85.24 | 1.69 |
| GCN  | 0       | 0.005 | 5.00E-05     | 64        | —    | —    | 3        | 92160   | 316.6461  | 1240  | 3.916   | 85.12 | 2.11 |
| GCN  | 0       | 0.005 | 5.00E-05     | 64        | —    | —    | Full     | 92160   | 318.3962  | 1161  | 3.6464  | 85.59 | 2.03 |
| GAT  | 0       | 0.005 | 5.00E-05     | 32        | —    | 1    | 3        | 92238   | 605.3269  | 1998  | 3.3007  | 83.66 | 1.54 |
| GAT  | 0       | 0.005 | 5.00E-05     | 32        | —    | 1    | Full     | 92238   | 548.7319  | 1638  | 2.9851  | 84.79 | 2.26 |
| GAT  | 0       | 0.005 | 5.00E-05     | 32        | —    | 8    | 3        | 762992  | 1491.5643 | 1594  | 1.069   | 86.26 | 1.35 |
| GAT  | 0       | 0.005 | 5.00E-05     | 32        | —    | 8    | Full     | 762992  | 1524.4348 | 1276  | 0.837   | 87.07 | 1.64 |
| GAT  | 0       | 0.005 | 5.00E-05     | 64        | —    | 1    | 3        | 184462  | 626.4011  | 1740  | 2.7778  | 84.15 | 1.29 |
| GAT  | 0       | 0.005 | 5.00E-05     | 64        | —    | 1    | Full     | 184462  | 682.7776  | 1465  | 2.1456  | 86.07 | 2.55 |
| GAT  | 0       | 0.005 | 5.00E-05     | 64        | —    | 8    | 3        | 1525872 | 2164.689  | 1348  | 0.6227  | 85.32 | 1.31 |
| GAT  | 0       | 0.005 | 5.00E-05     | 64        | —    | 8    | Full     | 1525872 | 2143.036  | 1105  | 0.5156  | 87.01 | 0.96 |
| GCN2 | 0       | 0.005 | 5.00E-05     | 32        | —    | —    | 3        | 48128   | 256.9575  | 1708  | 6.647   | 83.17 | 1.5  |
| GCN2 | 0       | 0.005 | 5.00E-05     | 32        | —    | —    | Full     | 48128   | 210.7702  | 1302  | 6.1773  | 84.38 | 2.03 |
| GCN2 | 0       | 0.005 | 5.00E-05     | 64        | —    | —    | 3        | 100352  | 353.0055  | 1581  | 4.4787  | 84.7  | 1.13 |
| GCN2 | 0       | 0.005 | 5.00E-05     | 64        | —    | —    | Full     | 100352  | 307.7913  | 1219  | 3.9605  | 84.79 | 1.64 |
| GCN2 | 0       | 0.005 | 5.00E-05     | Input Dim | —    | —    | 3        | 4117009 | 3013.6082 | 1051  | 0.3488  | 86.72 | 1.82 |
| GCN2 | 0       | 0.005 | 5.00E-05     | Input Dim | —    | —    | Full     | 4117009 | 3091.4392 | 1013  | 0.3277  | 87.54 | 1.66 |

Table 5: Study of Efficiency vs. Performance on Cora. CP pooling in comparison with classical pooling techniques.

|      | Dropout | LR    | Weight Decay | Hidden | Rank | Sampling | #Params | Time(s)  | Epoch | Epoch/s | Acc   | Std  |
|------|---------|-------|--------------|--------|------|----------|---------|----------|-------|---------|-------|------|
| tGNN | 0       | 0.005 | 5.00E-05     | 32     | 8    | 3        | 58128   | 290.9774 | 1389  | 4.7736  | 85.55 | 1.33 |
| Mean | 0       | 0.005 | 5.00E-05     | 32     | —    | Full     | 46080   | 449.2177 | 2352  | 5.2358  | 83.26 | 1.06 |
| Mean | 0       | 0.005 | 5.00E-05     | 64     | —    | Full     | 92160   | 398.3229 | 1496  | 3.7747  | 83.88 | 1.77 |
| Max  | 0       | 0.005 | 5.00E-05     | 32     | —    | Full     | 46080   | 464.0722 | 2371  | 5.0655  | 83.33 | 1.96 |
| Max  | 0       | 0.005 | 5.00E-05     | 64     | —    | Full     | 92160   | 394.1546 | 1496  | 3.7955  | 83.68 | 2.13 |

## E Dataset

A more detailed statistics of real-world datasets.

Table 6: Statistics of node graphs.

| Dataset         | #Nodes    | #Edges     | #Node Features | #Edge Features | #Classes |
|-----------------|-----------|------------|----------------|----------------|----------|
| <i>Cora</i>     | 2,708     | 5,429      | 1,433          | /              | 7        |
| <i>Citeseer</i> | 3,327     | 4,732      | 3,703          | /              | 6        |
| <i>Pubmed</i>   | 19,717    | 44,338     | 500            | /              | 3        |
| <i>PRODUCTS</i> | 2,449,029 | 61,859,140 | 100            | /              | 47       |
| <i>ARXIV</i>    | 169,343   | 1,166,243  | 128            | /              | 40       |
| <i>PROTEINS</i> | 132,534   | 9,561,252  | 8              | 8              | 112      |

## F Hyperparameter

For experiments on real-world datasets, we use NVIDIA P100 Pascal as our GPU computation resource.

Table 7: Statistics of graph datasets

| Dataset        | #Graphs | #Node Features | #Classes |
|----------------|---------|----------------|----------|
| <i>ZINC</i>    | 12,000  | 28             | /        |
| <i>CIFAR10</i> | 60,000  | 5              | 10       |
| <i>MNIST</i>   | 70,000  | 3              | 10       |
| <i>MolHIV</i>  | 41,127  | 9              | 2        |

507 And the searching hyperparameter includes the learning rate, weight decay, dropout, decomposition  
508 rank  $R$ .

Table 8: Hyperparameter searching range corresponding to Section 5.

| Hyperparameter | Searing Range                                     |
|----------------|---------------------------------------------------|
| learning rate  | {0.01, 0.001, 0.0001, 0.05, 0.005, 0.0005, 0.003} |
| weight decay   | {5e-5, 5e-4, 5e-3, 1e-5, 1e-4, 1e-3, 0}           |
| dropout        | {0, 0.1, 0.3, 0.5, 0.7, 0.8, 0.9}                 |
| $R$            | {32, 64, 128, 256, 512, 25, 50, 75, 100, 200}     |

Table 9: Hyperparameters for tGNN corresponding to Section 5.

| Dataset         | learning rate | weight decay | dropout | $R$ |
|-----------------|---------------|--------------|---------|-----|
| <i>Cora</i>     | 0.001         | 5.00E-05     | 0.9     | 512 |
| <i>Citeseer</i> | 0.001         | 1.00E-04     | 0       | 512 |
| <i>Pubmed</i>   | 0.005         | 5.00E-04     | 0.1     | 512 |
| <i>PRODUCTS</i> | 0.001         | 5.00E-05     | 0.3     | 128 |
| <i>ARXIV</i>    | 0.003         | 5.00E-05     | 0       | 512 |
| <i>PROTEINS</i> | 0.0005        | 5.00E-04     | 0.9     | 50  |
| <i>ZINC</i>     | 0.005         | 5.00E-04     | 0       | 100 |
| <i>CIFAR10</i>  | 0.005         | 1.00E-04     | 0       | 100 |
| <i>MNIST</i>    | 0.005         | 5.00E-05     | 0       | 75  |
| <i>MolHIV</i>   | 0.001         | 5.00E-05     | 0.8     | 100 |
